# Supplementary material
Source: Springer Nature journal article supplement (https://www.springermedizin.de/resource/supplementary/12888_2010_739_MOESM3_ESM.pdf/9478010)

### Promax Component 1 Loadings

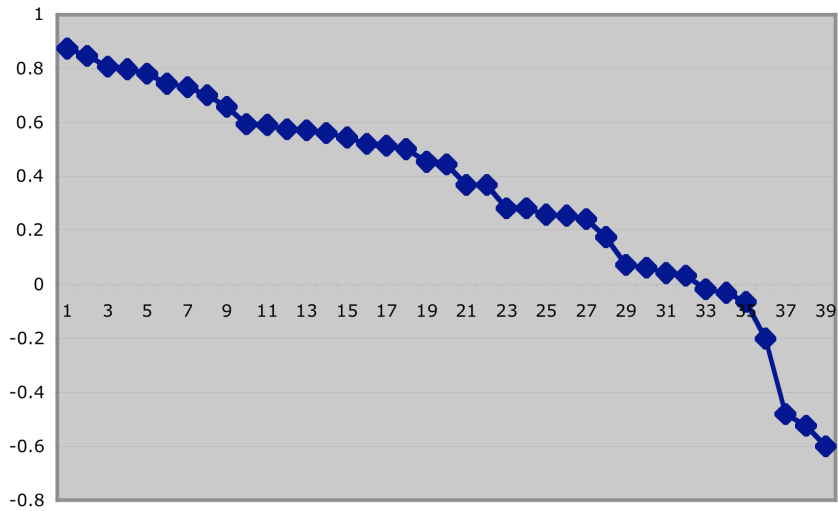

### Promax Component 2 Loadings

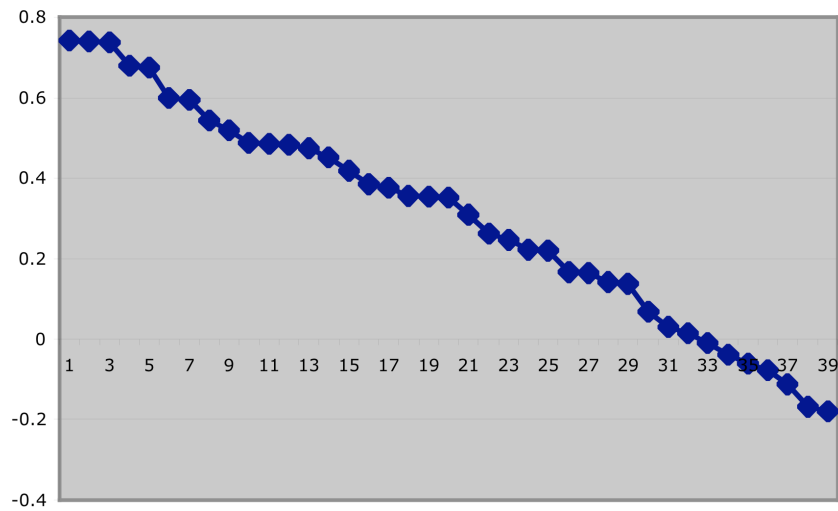

Supplement: MOESM3 [file 9478010]
